# Supplementary material for: Molten-salt-mediated synthesis of SiC nanowires for microwave absorption applications
Source: Royal Society of Chemistry journal article supplement (doi:10.1039/c2ce26510a), 2012-10-31
Supplement: c2ce26510a.pdf [file c2ce26510a.pdf]

## Supporting Information

The thermodynamic calculations of sodium chloride (NaCl) and sodium fluoride (NaF) are given as below.

**Table I.** Thermodynamic parameters<sup>1</sup>

| Substance       | $H$ (KJ·mol <sup>-1</sup> ) | $G$ (KJ·mol <sup>-1</sup> ) | $S$ (J·mol <sup>-1</sup> ·K <sup>-1</sup> ) |
|-----------------|-----------------------------|-----------------------------|---------------------------------------------|
| NaCl            | -181.4                      | -201.3                      | 229.8                                       |
| NaF             | -290.5                      | -309.8                      | 217.6                                       |
| Na              | 107.3                       | 76.8                        | 153.7                                       |
| Cl <sub>2</sub> | 0                           | 0                           | 223.1                                       |
| F <sub>2</sub>  | 0                           | 0                           | 202.8                                       |

The decomposition reactions of NaCl and NaF gases are given as

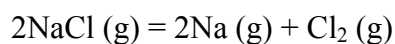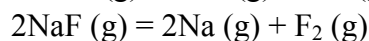

According to the thermodynamic equation:  $\Delta G = \Delta H - T\Delta S$ , the temperature  $T_{\text{NaCl}}$  required for decomposing NaCl can be calculated as follows:

$$\Delta H = 2 \cdot 107.3 - 2 \cdot (-181.4) = 577.4 \text{ KJ} \cdot \text{mol}^{-1}$$

$$\Delta S = 223.1 + 2 \cdot 153.7 - 2 \cdot 229.8 = 70.9 \text{ J} \cdot \text{mol}^{-1} \cdot \text{K}^{-1}$$

$$T_{\text{NaCl}} = \Delta H / \Delta S = 577.4 \cdot 1000 / 70.9 \approx 8149.5 \text{ K}$$

Similarly, the temperature  $T_{\text{NaF}}$  required for decomposing NaF can be calculated as

$$\Delta H = 2 \cdot 107.3 - 2 \cdot (-290.5) = 795.6 \text{ KJ} \cdot \text{mol}^{-1}$$

$$\Delta S = 202.8 + 2 \cdot 153.7 - 2 \cdot 217.6 = 75.0 \text{ J} \cdot \text{mol}^{-1} \cdot \text{K}^{-1}$$

$$T_{\text{NaF}} = \Delta H / \Delta S = 795.6 \cdot 1000 / 75.2 \approx 10579.8 \text{ K}$$

In the present study, the reaction happened at the temperature of 1250°C (1523K), which was far lower than the decomposition temperatures  $T_{\text{NaCl}}$  and  $T_{\text{NaF}}$ . Thus, the NaCl and NaF melts at 1250°C would not be decomposed into Na and Cl<sub>2</sub> and into Na and F<sub>2</sub>, respectively.

### Reference

1. I. Barin, Thermalchemical Data of Pure Substances, Wiley-VCH, 1997.
